# Supplementary material for: Molecular Structure and Phylogenetic Analyses of Complete Chloroplast Genomes of Two Aristolochia Medicinal Species
Source: PubMed Central journal article supplement (PMC5618488; doi:10.3390/ijms18091839), 2017-08-24
Supplement: ijms-18-01839-s001.pdf [file ijms-18-01839-s001.pdf]

# Molecular Structure and Phylogenetic Analyses of Complete Chloroplast Genomes of Two *Aristolochia* Medicinal Species

Jianguo Zhou<sup>1</sup>, Xinlian Chen<sup>1</sup>, Yingxian Cui<sup>1</sup>, Wei Sun<sup>2</sup>, Yonghua Li<sup>3</sup>, Yu Wang<sup>1</sup>, Jingyuan Song<sup>1</sup> and Hui Yao<sup>\*</sup>

<sup>1</sup> Key Lab of Chinese Medicine Resources Conservation, State Administration of Traditional Chinese Medicine of the People's Republic of China, Institute of Medicinal Plant Development, Chinese Academy of Medical Sciences & Peking Union Medical College, Beijing, 100193, China. [jgzhou1316@163.com](mailto:jgzhou1316@163.com) (J.Z.); [chenxinlian1053@163.com](mailto:chenxinlian1053@163.com) (X.C.); [yxcui2017@163.com](mailto:yxcui2017@163.com) (Y.C.); [ywang@implad.ac.cn](mailto:ywang@implad.ac.cn) (Y.W.); [jysong@implad.ac.cn](mailto:jysong@implad.ac.cn) (J.S.)

<sup>2</sup> Institute of Chinese Materia Medica, China Academy of Chinese Medicinal Sciences, Beijing 100700, China. [wsun@icmm.ac.cn](mailto:wsun@icmm.ac.cn) (W.S.)

<sup>3</sup> Department of Pharmacy, Guangxi Traditional Chinese Medicine University, Nanning, 530200, Guangxi, China. [liyonghua185@126.com](mailto:liyonghua185@126.com) (Y. L.)

\* Correspondence: [scauyaoh@sina.com](mailto:scauyaoh@sina.com); Tel: +86-10-57833194.

## Supplementary Materials

Table S1 Codon usage within the chloroplast genomes of *A. debilis* and *A. contorta*.

| Amino acid | Codon | No.  |      | RSCU |      | tRNA               | Amino acid | Codon | No. |     | RSCU |      | tRNA            |
|------------|-------|------|------|------|------|--------------------|------------|-------|-----|-----|------|------|-----------------|
|            |       | ①*   | ②*   | ①    | ②    |                    |            |       | ①   | ②   | ①    | ②    |                 |
| Phe        | UUU   | 869  | 883  | 1.2  | 1.22 |                    | Tyr        | UAU   | 736 | 736 | 1.55 | 1.55 |                 |
| Phe        | UUC   | 577  | 564  | 0.8  | 0.78 | <i>trnF-GAA</i>    | Tyr        | UAC   | 214 | 211 | 0.45 | 0.45 | <i>trnY-GUA</i> |
| Leu        | UUA   | 826  | 821  | 1.81 | 1.8  | <i>trnL-UAA</i>    | Stop       | UAA   | 39  | 41  | 1.38 | 1.45 |                 |
| Leu        | UUG   | 568  | 570  | 1.25 | 1.25 | <i>trnL-CAA</i>    | Stop       | UAG   | 26  | 23  | 0.92 | 0.81 |                 |
| Leu        | CUU   | 563  | 562  | 1.23 | 1.23 |                    | His        | CAU   | 489 | 487 | 1.5  | 1.51 |                 |
| Leu        | CUC   | 210  | 214  | 0.46 | 0.47 |                    | His        | CAC   | 162 | 160 | 0.5  | 0.49 | <i>trnH-GUG</i> |
| Leu        | CUA   | 378  | 376  | 0.83 | 0.83 | <i>trnL-UAG</i>    | Gln        | CAA   | 664 | 669 | 1.44 | 1.44 | <i>trnQ-UUG</i> |
| Leu        | CUG   | 192  | 190  | 0.42 | 0.42 |                    | Gln        | CAG   | 256 | 260 | 0.56 | 0.56 |                 |
| Ile        | AUU   | 1061 | 1067 | 1.44 | 1.44 |                    | Asn        | AAU   | 921 | 926 | 1.51 | 1.51 |                 |
| Ile        | AUC   | 465  | 465  | 0.63 | 0.63 | <i>trnI-GAU</i>    | Asn        | AAC   | 298 | 302 | 0.49 | 0.49 | <i>trnN-GUU</i> |
| Ile        | AUA   | 687  | 689  | 0.93 | 0.93 | <i>trnI-CAU</i>    | Lys        | AAA   | 987 | 995 | 1.44 | 1.45 | <i>trnK-UUU</i> |
| Met        | AUG   | 628  | 622  | 1    | 1    | <i>trn(f)M-CAU</i> | Lys        | AAG   | 383 | 376 | 0.56 | 0.55 |                 |
| Val        | GUU   | 508  | 510  | 1.43 | 1.44 |                    | Asp        | GAU   | 874 | 874 | 1.58 | 1.58 |                 |
| Val        | GUC   | 178  | 173  | 0.5  | 0.49 | <i>trnV-GAC</i>    | Asp        | GAC   | 235 | 231 | 0.42 | 0.42 | <i>trnD-GUC</i> |
| Val        | GUA   | 505  | 506  | 1.42 | 1.43 | <i>trnV-UAC</i>    | Glu        | GAA   | 972 | 969 | 1.42 | 1.42 | <i>trnE-UUC</i> |
| Val        | GUG   | 227  | 230  | 0.64 | 0.65 |                    | Glu        | GAG   | 393 | 395 | 0.58 | 0.58 |                 |
| Ser        | UCU   | 534  | 529  | 1.56 | 1.53 |                    | Cys        | UGU   | 236 | 234 | 1.5  | 1.49 |                 |
| Ser        | UCC   | 370  | 384  | 1.08 | 1.11 | <i>trnS-GGA</i>    | Cys        | UGC   | 79  | 81  | 0.5  | 0.51 | <i>trnC-GCA</i> |
| Ser        | UCA   | 417  | 421  | 1.21 | 1.22 | <i>trnS-UGA</i>    | Stop       | UGA   | 20  | 21  | 0.71 | 0.74 |                 |
| Ser        | UCG   | 196  | 193  | 0.57 | 0.56 |                    | Trp        | UGG   | 456 | 459 | 1    | 1    | <i>trnW-CCA</i> |
| Pro        | CCU   | 407  | 409  | 1.48 | 1.48 |                    | Arg        | CGU   | 330 | 328 | 1.23 | 1.23 | <i>trnR-ACG</i> |
| Pro        | CCC   | 247  | 245  | 0.9  | 0.89 |                    | Arg        | CGC   | 117 | 118 | 0.44 | 0.44 |                 |
| Pro        | CCA   | 305  | 309  | 1.11 | 1.12 | <i>trnP-UGG</i>    | Arg        | CGA   | 347 | 347 | 1.3  | 1.3  |                 |
| Pro        | CCG   | 140  | 139  | 0.51 | 0.5  |                    | Arg        | CGG   | 126 | 120 | 0.47 | 0.45 |                 |
| Thr        | ACU   | 528  | 528  | 1.56 | 1.57 |                    | Arg        | AGA   | 410 | 412 | 1.19 | 1.19 | <i>trnR-UCU</i> |
| Thr        | ACC   | 260  | 260  | 0.77 | 0.77 | <i>trnT-GGU</i>    | Arg        | AGG   | 133 | 131 | 0.39 | 0.38 |                 |
| Thr        | ACA   | 402  | 393  | 1.19 | 1.17 | <i>trnT-UGU</i>    | Ser        | AGU   | 497 | 498 | 1.86 | 1.87 |                 |
| Thr        | ACG   | 160  | 161  | 0.47 | 0.48 |                    | Ser        | AGC   | 188 | 191 | 0.7  | 0.72 | <i>trnS-GCU</i> |
| Ala        | GCU   | 637  | 640  | 1.79 | 1.79 |                    | Gly        | GGU   | 583 | 581 | 1.28 | 1.28 |                 |
| Ala        | GCC   | 221  | 220  | 0.62 | 0.62 |                    | Gly        | GGC   | 187 | 190 | 0.41 | 0.42 | <i>trnG-GCC</i> |
| Ala        | GCA   | 394  | 393  | 1.11 | 1.1  | <i>trnA-UGC</i>    | Gly        | GGA   | 712 | 716 | 1.56 | 1.57 | <i>trnG-UCC</i> |
| Ala        | GCG   | 171  | 174  | 0.48 | 0.49 |                    | Gly        | GGG   | 338 | 333 | 0.74 | 0.73 |                 |

RSCU: Relative Synonymous Codon Usage. ① *A. debilis*; ② *A. contorta*

**Table S2 RNA editing predicted in the chloroplast genomes of two *Aristolochia* species  
by the PREP program**

| Gene        | Nucleotide Position                   |                                        | Codon<br>change | Amino acid<br>change | Score |
|-------------|---------------------------------------|----------------------------------------|-----------------|----------------------|-------|
|             | <i>Aristolochia</i><br><i>debilis</i> | <i>Aristolochia</i><br><i>contorta</i> |                 |                      |       |
| <i>accD</i> | 295                                   | 295                                    | CTT-TTT         | L-F                  | 1.00  |
|             | 848                                   | 854                                    | TCG-TTG         | S-L                  | 0.80  |
|             | 1211                                  | 1217                                   | TCA-TTA         | S-L                  | 1.00  |
|             | 1457                                  | 1463                                   | CCT-CTT         | P-L                  | 1.00  |
| <i>atpA</i> | 773                                   | 773                                    | TCA-TTA         | S-L                  | 1.00  |
|             | 914                                   | 914                                    | TCA-TTA         | S-L                  | 1.00  |
|             | -                                     | 1148                                   | TCA-TTA         | S-L                  | 1.00  |
| <i>atpB</i> | 1190                                  | 1190                                   | TCA-TTA         | S-L                  | 1.00  |
| <i>atpF</i> | 92                                    | 92                                     | CCA-CTA         | P-L                  | 0.86  |
| <i>atpI</i> | 428                                   | 428                                    | CCC-CTC         | P-L                  | 1.00  |
|             | 629                                   | 629                                    | TCA-TTA         | S-L                  | 1.00  |
| <i>ccsA</i> | 514                                   | 514                                    | CTT-TTT         | L-F                  | 0.86  |
|             | 644                                   | 644                                    | ACT-ATT         | T-I                  | 0.86  |
| <i>clpP</i> | 82                                    | 82                                     | CAT-TAT         | H-Y                  | 1.00  |
|             | 559                                   | 559                                    | CAC-TAC         | H-Y                  | 1.00  |
| <i>matK</i> | -                                     | 53                                     | TCC-TTC         | S-F                  | 1.00  |
|             | 202                                   | 202                                    | CAT-TAT         | H-Y                  | 0.86  |
|             | -                                     | 325                                    | CTC-TTC         | L-F                  | 0.86  |
|             | 439                                   | 439                                    | CAT-TAT         | H-Y                  | 0.86  |
|             | 463                                   | 463                                    | CAC-TAC         | H-Y                  | 1.00  |
|             | 649                                   | 652                                    | CAT-TAT         | H-Y                  | 1.00  |
| <i>ndhA</i> | 1193                                  | 1196                                   | TCG-TTG         | S-L                  | 0.86  |
|             | 50                                    | 50                                     | TCG-TTG         | S-L                  | 1.00  |
|             | 107                                   | 107                                    | CCT-CTT         | P-L                  | 1.00  |
|             | 317                                   | 317                                    | GCC-GTC         | A-V                  | 1.00  |
|             | 341                                   | 341                                    | TCA-TTA         | S-L                  | 1.00  |
|             | 476                                   | 476                                    | TCA-TTA         | S-L                  | 1.00  |
|             | 566                                   | 566                                    | TCA-TTA         | S-L                  | 1.00  |
|             | 922                                   | 922                                    | CTC-TTC         | L-F                  | 1.00  |

|             |      |      |         |     |      |
|-------------|------|------|---------|-----|------|
| <i>ndhB</i> | 149  | 149  | TCA-TTA | S-L | 1.00 |
|             | 467  | 467  | CCA-CTA | P-L | 1.00 |
|             | 542  | 542  | ACG-ATG | T-M | 1.00 |
|             | 586  | 586  | CAT-TAT | H-Y | 1.00 |
|             | 611  | 611  | TCA-TTA | S-L | 0.80 |
|             | 830  | 830  | TCA-TTA | S-L | 1.00 |
|             | 836  | 836  | TCA-TTA | S-L | 1.00 |
|             | 1255 | 1255 | CAT-TAT | H-Y | 1.00 |
|             | 1481 | 1481 | CCA-CTA | P-L | 1.00 |
| <i>ndhD</i> | 23   | 23   | TCC-TTC | S-F | 0.80 |
|             | 575  | 575  | TCA-TTA | S-L | 1.00 |
|             | 650  | 650  | TCA-TTA | S-L | 1.00 |
|             | 854  | 854  | TCA-TTA | S-L | 1.00 |
|             | 863  | 863  | CCA-CTA | P-L | 1.00 |
|             | 1160 | 1160 | GCT-GTT | A-V | 0.80 |
|             | 1274 | 1274 | TCA-TTA | S-L | 0.80 |
|             | 1373 | 1373 | ACC-ATC | T-I | 1.00 |
| <i>ndhF</i> | 290  | 290  | TCA-TTA | S-L | 1.00 |
|             | 586  | 586  | CTT-TTT | L-F | 0.80 |
|             | 869  | -    | ACA-ATA | T-I | 1.00 |
|             | 890  | -    | ACA-ATA | T-I | 1.00 |
|             | 1001 | 1001 | TCA-TTA | S-L | 1.00 |
|             | 1783 | -    | CCT-CTT | P-S | 1.00 |
|             | 2014 | 2014 | CTT-TTT | L-F | 1.00 |
|             | 2233 | 2234 | CTT-TTT | L-F | 1.00 |
| <i>ndhG</i> | 155  | 155  | CCA-CTA | P-L | 1.00 |
|             | 314  | 314  | ACA-ATA | T-I | 0.80 |
| <i>petB</i> | 418  | -    | CGG-TGG | R-W | 1.00 |
|             | 611  | 611  | CCA-CTA | P-L | 1.00 |
| <i>petD</i> | -    | -    | -       | -   | -    |
| <i>petG</i> | -    | -    | -       | -   | -    |
| <i>petL</i> | -    | 83   | ACA-ATA | T-I | 1.00 |
| <i>psaB</i> | 1919 | 1919 | ACG-ATG | T-M | 1.00 |
| <i>psaI</i> | 80   | 80   | TCT-TTT | S-F | 0.86 |

|              |      |      |         |     |      |
|--------------|------|------|---------|-----|------|
| <i>psbB</i>  | -    | -    | -       | -   | -    |
| <i>psbE</i>  | -    | -    | -       | -   | -    |
| <i>psbF</i>  | 77   | 77   | TCT-TTT | S-F | 1.00 |
| <i>psbL</i>  | -    | -    | -       | -   | -    |
| <i>rpl2</i>  | 2    | 2    | ACG-ATG | T-M | 1.00 |
| <i>rpl20</i> | 256  | 256  | CAC-TAC | H-Y | 0.86 |
|              | 308  | 308  | TCA-TTA | S-L | 0.86 |
| <i>rpl23</i> | -    | -    | -       | -   | -    |
| <i>rpoA</i>  | 82   | 82   | CAT-TAT | S-L | 0.86 |
|              | 368  | -    | TCA-TTA | S-L | 1.00 |
|              | -    | 368  | TCG-TTG | S-L | 1.00 |
| <i>rpoB</i>  | 338  | 338  | TCT-TTT | S-F | 1.00 |
|              | 473  | 473  | TCA-TTA | S-L | 0.86 |
|              | 566  | 566  | TCG-TTG | S-L | 1.00 |
|              | 1877 | 1877 | GCT-GTT | A-V | 0.86 |
|              | 2033 | 2033 | GCA-GTA | A-V | 1.00 |
| <i>rpoC1</i> | 41   | 41   | TCG-TTG | S-L | 1.00 |
|              | 926  | 926  | CCA-CTA | P-L | 1.00 |
| <i>rpoC2</i> | 1594 | 1594 | CCT-CTT | P-F | 1.00 |
|              | 1595 | 1595 | CCT-CTT | P-F | 1.00 |
|              | 2296 | 2296 | CGG-TGG | R-W | 1.00 |
|              | 2725 | 2725 | CCC-CTC | P-S | 1.00 |
|              | 3047 | 3047 | GCC-GTC | A-V | 0.86 |
|              | 3301 | 3301 | CAT-TAT | H-Y | 1.00 |
|              | 3713 | 3713 | TCA-TTA | S-L | 0.86 |
| <i>rps2</i>  | 248  | 248  | TCA-TTA | S-L | 1.00 |
| <i>rps8</i>  | 169  | 169  | CAT-TAT | H-Y | 0.86 |
|              | 182  | 182  | TCA-TTA | S-L | 0.86 |
| <i>rps14</i> | 80   | 80   | CCC-CTC | P-L | 1.00 |
|              | 149  | 149  | CCG-CTG | P-L | 1.00 |
| <i>rps16</i> | 212  | 212  | TCA-TTA | S-L | 0.83 |
| <i>ycf3</i>  | 44   | 44   | TCC-TTC | S-F | 1.00 |
|              | 53   | 53   | GCA-GTA | A-V | 1.00 |
|              | 185  | 185  | ACG-ATG | T-M | 1.00 |

407

407

TCT-TTT

S-F

1.00

---

**Table S3 Simple sequence repeats (SSRs) in *A. debilis* chloroplast genome.**

| SSR nr. | SSR type | SSR      | size | start | end   |
|---------|----------|----------|------|-------|-------|
| 1       | p1       | (T)11    | 11   | 99    | 109   |
| 2       | p4       | (GATA)3  | 12   | 1418  | 1429  |
| 3       | p2       | (AT)5    | 10   | 3892  | 3901  |
| 4       | p2       | (AT)5    | 10   | 4494  | 4503  |
| 5       | p1       | (A)11    | 11   | 4627  | 4637  |
| 6       | p1       | (T)14    | 14   | 4728  | 4741  |
| 7       | p3       | (ATG)4   | 12   | 4802  | 4813  |
| 8       | p1       | (A)11    | 11   | 5130  | 5140  |
| 9       | p2       | (TA)5    | 10   | 6452  | 6461  |
| 10      | p1       | (A)12    | 12   | 6737  | 6748  |
| 11      | p1       | (A)15    | 15   | 7485  | 7499  |
| 12      | p1       | (A)14    | 14   | 8231  | 8244  |
| 13      | p5       | (TATTA)3 | 15   | 8349  | 8363  |
| 14      | p1       | (T)11    | 11   | 8650  | 8660  |
| 15      | p1       | (T)12    | 12   | 8682  | 8693  |
| 16      | p1       | (T)10    | 10   | 9092  | 9101  |
| 17      | p1       | (A)17    | 17   | 11618 | 11634 |
| 18      | p1       | (A)11    | 11   | 12814 | 12824 |
| 19      | p3       | (TTA)6   | 18   | 13120 | 13137 |
| 20      | p5       | (TATAA)3 | 15   | 14143 | 14157 |
| 21      | p2       | (AT)6    | 12   | 14207 | 14218 |
| 22      | p2       | (AT)7    | 14   | 14405 | 14418 |
| 23      | p1       | (T)16    | 16   | 14854 | 14869 |
| 24      | p1       | (T)11    | 11   | 14993 | 15003 |
| 25      | p2       | (AT)5    | 10   | 20283 | 20292 |
| 26      | p1       | (T)11    | 11   | 23368 | 23378 |
| 27      | p1       | (T)12    | 12   | 26621 | 26632 |
| 28      | p1       | (T)10    | 10   | 28042 | 28051 |
| 29      | p1       | (A)15    | 15   | 28222 | 28236 |
| 30      | p1       | (A)11    | 11   | 28650 | 28660 |
| 31      | p1       | (T)12    | 12   | 29448 | 29459 |
| 32      | p1       | (T)12    | 12   | 29462 | 29473 |
| 33      | p1       | (C)13    | 13   | 30202 | 30214 |
| 34      | p3       | (ATA)4   | 12   | 30643 | 30654 |
| 35      | p1       | (A)11    | 11   | 30983 | 30993 |
| 36      | p1       | (T)11    | 11   | 31197 | 31207 |
| 37      | p1       | (A)10    | 10   | 31447 | 31456 |
| 38      | p1       | (A)11    | 11   | 31545 | 31555 |
| 39      | p2       | (TA)8    | 16   | 32976 | 32991 |
| 40      | p1       | (T)14    | 14   | 34255 | 34268 |
| 41      | p1       | (C)11    | 11   | 34499 | 34509 |
| 42      | p4       | (TTTG)3  | 12   | 35078 | 35089 |

|    |    |          |    |       |       |
|----|----|----------|----|-------|-------|
| 43 | p1 | (T)13    | 13 | 37750 | 37762 |
| 44 | p2 | (TA)7    | 14 | 37814 | 37827 |
| 45 | p1 | (A)14    | 14 | 38298 | 38311 |
| 46 | p1 | (A)14    | 14 | 38806 | 38819 |
| 47 | p2 | (AT)11   | 22 | 38925 | 38946 |
| 48 | p2 | (TA)6    | 12 | 38948 | 38959 |
| 49 | p1 | (A)10    | 10 | 45060 | 45069 |
| 50 | p1 | (T)10    | 10 | 45907 | 45916 |
| 51 | p1 | (T)11    | 11 | 46890 | 46900 |
| 52 | p1 | (A)10    | 10 | 46955 | 46964 |
| 53 | p5 | (AATCA)3 | 15 | 46967 | 46981 |
| 54 | p1 | (A)13    | 13 | 47228 | 47240 |
| 55 | p3 | (ATA)4   | 12 | 49660 | 49671 |
| 56 | p3 | (ATA)4   | 12 | 49717 | 49728 |
| 57 | p1 | (A)12    | 12 | 49906 | 49917 |
| 58 | p1 | (A)16    | 16 | 50367 | 50382 |
| 59 | p2 | (TA)7    | 14 | 50588 | 50601 |
| 60 | p1 | (T)11    | 11 | 50877 | 50887 |
| 61 | p4 | (TTTG)3  | 12 | 51518 | 51529 |
| 62 | p2 | (AT)6    | 12 | 54289 | 54300 |
| 63 | p2 | (AT)5    | 10 | 54346 | 54355 |
| 64 | p1 | (T)14    | 14 | 54550 | 54563 |
| 65 | p1 | (T)10    | 10 | 56369 | 56378 |
| 66 | p5 | (TTAAT)3 | 15 | 60915 | 60929 |
| 67 | p3 | (CAA)4   | 12 | 63531 | 63542 |
| 68 | p1 | (A)11    | 11 | 64047 | 64057 |
| 69 | p2 | (AT)7    | 14 | 64072 | 64085 |
| 70 | p1 | (T)12    | 12 | 65389 | 65400 |
| 71 | p1 | (A)10    | 10 | 65828 | 65837 |
| 72 | p1 | (A)10    | 10 | 65950 | 65959 |
| 73 | p4 | (AATG)3  | 12 | 66622 | 66633 |
| 74 | p3 | (TAT)4   | 12 | 67863 | 67874 |
| 75 | p1 | (A)12    | 12 | 67884 | 67895 |
| 76 | p5 | (TTTTA)3 | 15 | 68093 | 68107 |
| 77 | p4 | (GAAT)3  | 12 | 68797 | 68808 |
| 78 | p1 | (T)12    | 12 | 70181 | 70192 |
| 79 | p1 | (A)17    | 17 | 70523 | 70539 |
| 80 | p1 | (T)15    | 15 | 71210 | 71224 |
| 81 | p1 | (T)11    | 11 | 71535 | 71545 |
| 82 | p1 | (T)11    | 11 | 71560 | 71570 |
| 83 | p4 | (TAAC)3  | 12 | 71759 | 71770 |
| 84 | p2 | (TA)5    | 10 | 71775 | 71784 |
| 85 | p1 | (T)13    | 13 | 72086 | 72098 |
| 86 | p1 | (G)15    | 15 | 72218 | 72232 |



|     |    |           |    |        |        |
|-----|----|-----------|----|--------|--------|
| 87  | p2 | (TA)6     | 12 | 72831  | 72842  |
| 88  | p3 | (TAT)4    | 12 | 72913  | 72924  |
| 89  | p1 | (A)16     | 16 | 73458  | 73473  |
| 90  | p4 | (AAAT)4   | 16 | 74234  | 74249  |
| 91  | p4 | (ATAA)4   | 16 | 74315  | 74330  |
| 92  | p1 | (A)12     | 12 | 75892  | 75903  |
| 93  | p1 | (A)15     | 15 | 76406  | 76420  |
| 94  | p1 | (T)11     | 11 | 76608  | 76618  |
| 95  | p1 | (A)14     | 14 | 80007  | 80020  |
| 96  | p1 | (A)14     | 14 | 81647  | 81660  |
| 97  | p1 | (A)11     | 11 | 82944  | 82954  |
| 98  | p1 | (T)10     | 10 | 83109  | 83118  |
| 99  | p1 | (T)11     | 11 | 84763  | 84773  |
| 100 | p1 | (T)11     | 11 | 87079  | 87089  |
| 101 | p1 | (T)15     | 15 | 89560  | 89574  |
| 102 | p2 | (TA)7     | 14 | 99799  | 99812  |
| 103 | p1 | (A)11     | 11 | 101122 | 101132 |
| 104 | p4 | (TTAT)3   | 12 | 104467 | 104478 |
| 105 | p1 | (A)14     | 14 | 113511 | 113524 |
| 106 | p1 | (T)10     | 10 | 117101 | 117110 |
| 107 | p1 | (T)11     | 11 | 117856 | 117866 |
| 108 | p1 | (T)11     | 11 | 118595 | 118605 |
| 109 | p1 | (T)18     | 18 | 118712 | 118729 |
| 110 | p1 | (T)10     | 10 | 118961 | 118970 |
| 111 | p1 | (T)10     | 10 | 119009 | 119018 |
| 112 | p1 | (A)10     | 10 | 119187 | 119196 |
| 113 | p5 | (AATAA)3  | 15 | 122191 | 122205 |
| 114 | p1 | (A)10     | 10 | 122579 | 122588 |
| 115 | p4 | (TCTA)3   | 12 | 122789 | 122800 |
| 116 | p2 | (AT)5     | 10 | 122829 | 122838 |
| 117 | p4 | (TTGA)3   | 12 | 122914 | 122925 |
| 118 | p3 | (AAT)4    | 12 | 128834 | 128845 |
| 119 | p1 | (A)16     | 16 | 129152 | 129167 |
| 120 | p1 | (T)14     | 14 | 130392 | 130405 |
| 121 | p1 | (T)10     | 10 | 131549 | 131558 |
| 122 | p1 | (A)10     | 10 | 132611 | 132620 |
| 123 | p6 | (AGTATC)3 | 18 | 132810 | 132827 |
| 124 | p3 | (TTC)4    | 12 | 133902 | 133913 |
| 125 | p1 | (T)11     | 11 | 134200 | 134210 |
| 126 | p1 | (T)14     | 14 | 135879 | 135892 |
| 127 | p4 | (ATAA)3   | 12 | 144925 | 144936 |
| 128 | p1 | (T)11     | 11 | 148271 | 148281 |
| 129 | p2 | (AT)7     | 14 | 149590 | 149603 |

---

**Table S4 Simple sequence repeats (SSRs) in *A. contorta* chloroplast genome.**

| SSR nr. | SSR type | SSR                                 | size | start | end   |
|---------|----------|-------------------------------------|------|-------|-------|
| 1       | p6       | (CATATA) <sup>3</sup>               | 18   | 110   | 127   |
| 2       | p1       | (A) <sup>12</sup>                   | 12   | 1555  | 1566  |
| 3       | p1       | (T) <sup>11</sup>                   | 11   | 1857  | 1867  |
| 4       | p1       | (A) <sup>16</sup>                   | 16   | 2846  | 2861  |
| 5       | p2       | (AT) <sup>5</sup>                   | 10   | 3859  | 3868  |
| 6       | p2       | (TA) <sup>9</sup>                   | 18   | 3961  | 3978  |
| 7       | p3       | (ATA) <sup>4</sup>                  | 12   | 4409  | 4420  |
| 8       | p2       | (AT) <sup>7</sup>                   | 14   | 4578  | 4591  |
| 9       | p2       | (TA) <sup>5</sup>                   | 10   | 4693  | 4702  |
| 10      | p1       | (A) <sup>11</sup>                   | 11   | 4715  | 4725  |
| 11      | p1       | (T) <sup>12</sup>                   | 12   | 4814  | 4825  |
| 12      | p1       | (A) <sup>10</sup>                   | 10   | 5202  | 5211  |
| 13      | p1       | (C) <sup>10</sup>                   | 10   | 5256  | 5265  |
| 14      | p1       | (A) <sup>11</sup>                   | 11   | 6792  | 6802  |
| 15      | p1       | (A) <sup>22</sup>                   | 22   | 7568  | 7589  |
| 16      | p1       | (A) <sup>16</sup>                   | 16   | 8331  | 8346  |
| 17      | p1       | (T) <sup>11</sup>                   | 11   | 8737  | 8747  |
| 18      | p1       | (A) <sup>10</sup>                   | 10   | 8798  | 8807  |
| 19      | p1       | (G) <sup>10</sup>                   | 10   | 8991  | 9000  |
| 20      | p4       | (TTTA) <sup>3</sup>                 | 12   | 9853  | 9864  |
| 21      | p1       | (A) <sup>14</sup>                   | 14   | 10104 | 10117 |
| 22      | p1       | (A) <sup>17</sup>                   | 17   | 10233 | 10249 |
| 23      | p1       | (A) <sup>11</sup>                   | 11   | 12005 | 12015 |
| 24      | p2       | (TA) <sup>5</sup>                   | 10   | 12782 | 12791 |
| 25      | p3       | (ATT) <sup>4</sup>                  | 12   | 13000 | 13011 |
| 26      | p3       | (TTA) <sup>5</sup>                  | 15   | 13460 | 13474 |
| 27      | p2       | (AT) <sup>5</sup>                   | 10   | 14605 | 14614 |
| 28      | p2       | (AT) <sup>8</sup>                   | 16   | 14783 | 14798 |
| 29      | p1       | (T) <sup>10</sup>                   | 10   | 15217 | 15226 |
| 30      | p1       | (T) <sup>10</sup>                   | 10   | 17057 | 17066 |
| 31      | p2       | (AT) <sup>5</sup>                   | 10   | 20658 | 20667 |
| 32      | p1       | (T) <sup>11</sup>                   | 11   | 23740 | 23750 |
| 33      | p1       | (T) <sup>10</sup>                   | 10   | 26995 | 27004 |
| 34      | p1       | (T) <sup>10</sup>                   | 10   | 28556 | 28565 |
| 35      | p1       | (A) <sup>10</sup>                   | 10   | 28582 | 28591 |
| 36      | p1       | (A) <sup>12</sup>                   | 12   | 29007 | 29018 |
| 37      | p1       | (A) <sup>10</sup>                   | 10   | 29020 | 29029 |
| 38      | p1       | (A) <sup>10</sup>                   | 10   | 29644 | 29653 |
| 39      | p1       | (T) <sup>11</sup>                   | 11   | 29827 | 29837 |
| 40      | p1       | (T) <sup>11</sup>                   | 11   | 29841 | 29851 |
| 41      | c        | (C) <sup>14</sup> (T) <sup>14</sup> | 28   | 30575 | 30602 |
| 42      | p1       | (A) <sup>15</sup>                   | 15   | 31357 | 31371 |

|    |    |            |    |       |       |
|----|----|------------|----|-------|-------|
| 43 | p1 | (T)10      | 10 | 31575 | 31584 |
| 44 | p1 | (A)11      | 11 | 31679 | 31689 |
| 45 | p1 | (A)10      | 10 | 31775 | 31784 |
| 46 | p2 | (TA)9      | 18 | 33178 | 33195 |
| 47 | p1 | (T)10      | 10 | 34284 | 34293 |
| 48 | c  | (C)11(T)11 | 22 | 34536 | 34557 |
| 49 | p5 | (ATATA)3   | 15 | 34731 | 34745 |
| 50 | p5 | (TAATA)3   | 15 | 34756 | 34770 |
| 51 | p4 | (TTTG)3    | 12 | 35090 | 35101 |
| 52 | p1 | (T)11      | 11 | 37762 | 37772 |
| 53 | p1 | (A)10      | 10 | 38156 | 38165 |
| 54 | p1 | (A)18      | 18 | 38187 | 38204 |
| 55 | p1 | (T)15      | 15 | 38602 | 38616 |
| 56 | p1 | (A)14      | 14 | 38686 | 38699 |
| 57 | p2 | (AT)12     | 24 | 38809 | 38832 |
| 58 | p1 | (A)11      | 11 | 44926 | 44936 |
| 59 | p1 | (T)10      | 10 | 45781 | 45790 |
| 60 | p1 | (T)10      | 10 | 46757 | 46766 |
| 61 | p1 | (A)10      | 10 | 46821 | 46830 |
| 62 | p1 | (A)14      | 14 | 47089 | 47102 |
| 63 | p3 | (TTA)4     | 12 | 49428 | 49439 |
| 64 | p2 | (TA)8      | 16 | 49492 | 49507 |
| 65 | p2 | (AT)6      | 12 | 49509 | 49520 |
| 66 | p3 | (ATA)4     | 12 | 49564 | 49575 |
| 67 | p2 | (TA)9      | 18 | 49592 | 49609 |
| 68 | p1 | (A)13      | 13 | 50220 | 50232 |
| 69 | p1 | (A)11      | 11 | 50263 | 50273 |
| 70 | p2 | (TA)5      | 10 | 50474 | 50483 |
| 71 | p1 | (T)10      | 10 | 50777 | 50786 |
| 72 | p4 | (TTTG)3    | 12 | 51412 | 51423 |
| 73 | p2 | (AT)7      | 14 | 53971 | 53984 |
| 74 | p2 | (AT)10     | 20 | 53995 | 54014 |
| 75 | p2 | (AT)5      | 10 | 54098 | 54107 |
| 76 | p1 | (T)14      | 14 | 54291 | 54304 |
| 77 | p3 | (TTA)4     | 12 | 54606 | 54617 |
| 78 | p1 | (A)10      | 10 | 55302 | 55311 |
| 79 | p1 | (T)14      | 14 | 56282 | 56295 |
| 80 | p4 | (ATAC)4    | 16 | 61105 | 61120 |
| 81 | p4 | (ATTA)4    | 16 | 63256 | 63271 |
| 82 | p2 | (AT)5      | 10 | 63298 | 63307 |
| 83 | p3 | (CAA)4     | 12 | 63510 | 63521 |
| 84 | p1 | (A)13      | 13 | 64015 | 64027 |
| 85 | p2 | (AT)7      | 14 | 64036 | 64049 |
| 86 | p1 | (T)12      | 12 | 65351 | 65362 |

|     |    |           |    |        |        |
|-----|----|-----------|----|--------|--------|
| 87  | p1 | (A)13     | 13 | 65784  | 65796  |
| 88  | p1 | (A)10     | 10 | 65907  | 65916  |
| 89  | p2 | (TC)5     | 10 | 65969  | 65978  |
| 90  | p4 | (AATG)3   | 12 | 66579  | 66590  |
| 91  | p3 | (TAT)4    | 12 | 67825  | 67836  |
| 92  | p1 | (A)13     | 13 | 67858  | 67870  |
| 93  | p4 | (GAAT)3   | 12 | 68794  | 68805  |
| 94  | p1 | (A)12     | 12 | 70154  | 70165  |
| 95  | p1 | (T)10     | 10 | 70182  | 70191  |
| 96  | p1 | (A)14     | 14 | 70538  | 70551  |
| 97  | p1 | (T)10     | 10 | 71056  | 71065  |
| 98  | p1 | (T)11     | 11 | 71214  | 71224  |
| 99  | p4 | (TAAC)3   | 12 | 71735  | 71746  |
| 100 | p2 | (TA)11    | 22 | 71751  | 71772  |
| 101 | p1 | (T)13     | 13 | 72065  | 72077  |
| 102 | p1 | (G)15     | 15 | 72192  | 72206  |
| 103 | p4 | (ATAA)3   | 12 | 72707  | 72718  |
| 104 | p2 | (TA)7     | 14 | 72803  | 72816  |
| 105 | p2 | (TA)9     | 18 | 72820  | 72837  |
| 106 | p6 | (TTCTAT)3 | 18 | 72851  | 72868  |
| 107 | p1 | (A)12     | 12 | 73458  | 73469  |
| 108 | p3 | (ATA)4    | 12 | 73561  | 73572  |
| 109 | p1 | (T)14     | 14 | 73601  | 73614  |
| 110 | p1 | (A)12     | 12 | 74292  | 74303  |
| 111 | p4 | (ATAA)3   | 12 | 74374  | 74385  |
| 112 | p1 | (A)17     | 17 | 76476  | 76492  |
| 113 | p1 | (T)12     | 12 | 76680  | 76691  |
| 114 | p2 | (TA)5     | 10 | 76799  | 76808  |
| 115 | p1 | (A)13     | 13 | 80123  | 80135  |
| 116 | p1 | (A)19     | 19 | 81771  | 81789  |
| 117 | p1 | (A)21     | 21 | 83068  | 83088  |
| 118 | p1 | (T)10     | 10 | 84907  | 84916  |
| 119 | p1 | (A)10     | 10 | 86518  | 86527  |
| 120 | p1 | (T)13     | 13 | 87245  | 87257  |
| 121 | p1 | (T)14     | 14 | 89738  | 89751  |
| 122 | p2 | (TA)5     | 10 | 99982  | 99991  |
| 123 | p1 | (A)10     | 10 | 101301 | 101310 |
| 124 | p4 | (TTAT)3   | 12 | 104657 | 104668 |
| 125 | p1 | (T)10     | 10 | 108695 | 108704 |
| 126 | p1 | (A)15     | 15 | 113707 | 113721 |
| 127 | p1 | (A)10     | 10 | 115310 | 115319 |
| 128 | p1 | (T)10     | 10 | 117560 | 117569 |
| 129 | p1 | (T)11     | 11 | 118322 | 118332 |
| 130 | p3 | (TAT)4    | 12 | 118540 | 118551 |

|     |    |            |    |        |        |
|-----|----|------------|----|--------|--------|
| 131 | p1 | (T)12      | 12 | 119078 | 119089 |
| 132 | c  | (TG)5(T)11 | 21 | 119189 | 119209 |
| 133 | p5 | (ACATA)3   | 15 | 119344 | 119358 |
| 134 | p1 | (T)11      | 11 | 119419 | 119429 |
| 135 | p1 | (T)10      | 10 | 119472 | 119481 |
| 136 | p1 | (A)12      | 12 | 119649 | 119660 |
| 137 | p5 | (AATAA)3   | 15 | 122667 | 122681 |
| 138 | p1 | (A)10      | 10 | 123055 | 123064 |
| 139 | p4 | (TCTA)3    | 12 | 123273 | 123284 |
| 140 | p2 | (AT)5      | 10 | 123299 | 123308 |
| 141 | p4 | (TTGA)3    | 12 | 123377 | 123388 |
| 142 | p1 | (T)11      | 11 | 126240 | 126250 |
| 143 | p3 | (AAT)6     | 18 | 129279 | 129296 |
| 144 | p1 | (T)13      | 13 | 130827 | 130839 |
| 145 | p1 | (T)10      | 10 | 132043 | 132052 |
| 146 | p1 | (A)10      | 10 | 133099 | 133108 |
| 147 | p3 | (TTC)4     | 12 | 134390 | 134401 |
| 148 | p1 | (T)14      | 14 | 134694 | 134707 |
| 149 | p1 | (T)15      | 15 | 136637 | 136651 |
| 150 | p1 | (A)10      | 10 | 141654 | 141663 |
| 151 | p4 | (ATAA)3    | 12 | 145690 | 145701 |
| 152 | p1 | (T)10      | 10 | 149048 | 149057 |
| 153 | p2 | (AT)5      | 10 | 150366 | 150375 |

---

**Table S5 Primer sequences at the boundaries between single copy and IR regions.**

| Species            | Regions | Forward/Reverse | Primer sequence (5' to 3') |
|--------------------|---------|-----------------|----------------------------|
| <i>A. debilis</i>  | LSC-IRa | F               | TTTGGTTGCTAGTCCCCCAC       |
|                    |         | R               | AGGCACGGCCATACATAACA       |
|                    | IRa-SSC | F               | TAGTGGCTCCGTTTCATGCC       |
|                    |         | R               | GCGTACCTTCTATATGGTTCCGTT   |
|                    | SSC-IRb | F               | GTGACCGATTAACCAACCGAC      |
|                    |         | R               | GTAGTGGCTCCGTTTCATGC       |
|                    | IRb-LSC | F               | CCTTAGGCACGGCCATACA        |
|                    |         | R               | ACTTCCCTCTAGACCTGGCTG      |
| <i>A. contorta</i> | LSC-IRa | F               | TGGTTGCTAGTCCCCCACTT       |
|                    |         | R               | AGGCACGGCCATACATAACA       |
|                    | IRa-SSC | F               | TAGTGGCTCCGTTTCATGCC       |
|                    |         | R               | TGTCAAAGTGGGTCCTAAGAGA     |
|                    | SSC-IRb | F               | AATAGCAGCCCAATCCATTCA      |
|                    |         | R               | GCTCCGTTTCATGCCTCATT       |
|                    | IRb-LSC | F               | CCGATATGCCCTTAGGCACG       |
|                    |         | R               | CAACCGTGCAAACCTTGTA        |

**Table S6 GenBank accession numbers of dicots with complete chloroplast genome sequences used for phylogenetic analyses.**

| GenBank acc. | Species                        | GenBank acc. | Species                                  |
|--------------|--------------------------------|--------------|------------------------------------------|
| NC_034692    | <i>Piper nigrum</i>            | NC_022457    | <i>Berberis bealei</i>                   |
| NC_027941    | <i>Piper kadsura</i>           | NC_004993    | <i>Calycanthus floridus var. glaucus</i> |
| NC_034697    | <i>Piper auritum</i>           | NC_029427    | <i>Akebia trifoliata</i>                 |
| NC_008457    | <i>Piper cenocladum</i>        | NC_034700    | <i>Laurus nobilis</i>                    |
| NC_009598    | <i>Chloranthus spicatus</i>    | NC_034926    | <i>Phoebe bournei</i>                    |
| NC_026565    | <i>Chloranthus japonicus</i>   | NC_028073    | <i>Machilus yunnanensis</i>              |
| NC_020316    | <i>Magnolia officinalis</i>    | NC_034908    | <i>Schisandra chinensis</i>              |
| NC_020318    | <i>Magnolia grandiflora</i>    | NC_031849    | <i>Trollius chinensis</i>                |
| NC_030504    | <i>Liriodendron chinense</i>   | NC_008796    | <i>Ranunculus macranthus</i>             |
| NC_008326    | <i>Liriodendron tulipifera</i> | NC_028000    | <i>Clematis terniflora</i>               |
| NC_029432    | <i>Stephania japonica</i>      | NC_030761    | <i>Aconitum carmichaelii</i>             |
| NC_030166    | <i>Annona cherimola</i>        | NC_034347    | <i>Fragaria pentaphylla</i>              |
| NC_029428    | <i>Epimedium sagittatum</i>    | NC_032038    | <i>Rosa roxburghii</i>                   |
| NC_029943    | <i>Epimedium koreanum</i>      | NC_022868    | <i>Glycine soja</i>                      |
| NC_008336    | <i>Nandina domestica</i>       | NC_018051    | <i>Vigna unguiculata</i>                 |
| KJ468103     | <i>Tamarindus indica</i>       | NC_006290    | <i>Panax ginseng</i>                     |
| NC_020431    | <i>Salvia miltiorrhiza</i>     | NC_001879    | <i>Nicotiana tabacum</i>                 |
| NC_001879    | <i>Arabidopsis thaliana</i>    |              |                                          |
